# Supplementary material for: Distinct Inflammation Biomarkers in Healthy Individuals and Patients with Schizophrenia: A Reliability Testing of Multiplex Cytokine Immunoassay by Bland-Altman Analysis
Source: PubMed Central journal article supplement — Psychiatry Investig. 2019 Jul 30;16(8):607–14. doi: 10.30773/pi.2019.04.14 (PMC6710413; doi:10.30773/pi.2019.04.14), 2019-07-30
Supplement: pi-2019-04-14-suppl.pdf [file pi-2019-04-14-suppl.pdf]

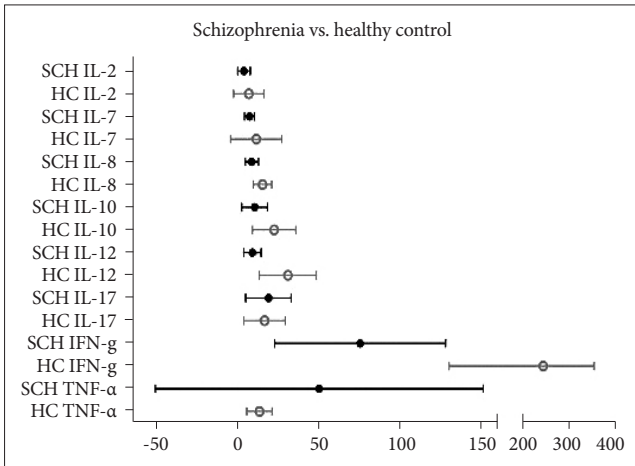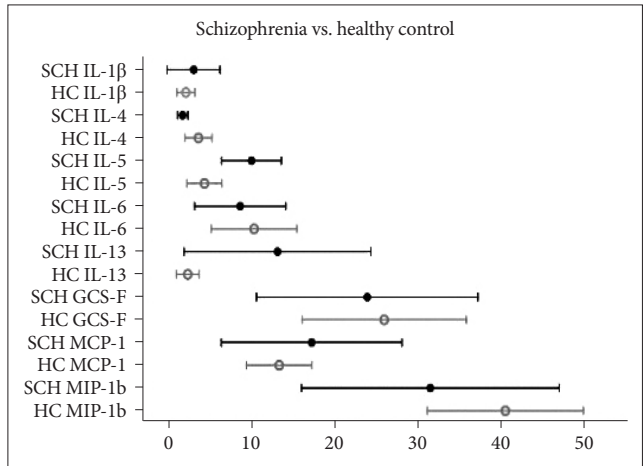

**Supplementary Figure 1.** Distribution of baseline cytokines of patients with schizophrenia and healthy controls.
